# Supplementary material for: Bison: bisulfite alignment on nodes of a cluster
Source: Springer Nature journal article supplement (doi:10.1186/1471-2105-15-337), 2014-10-18

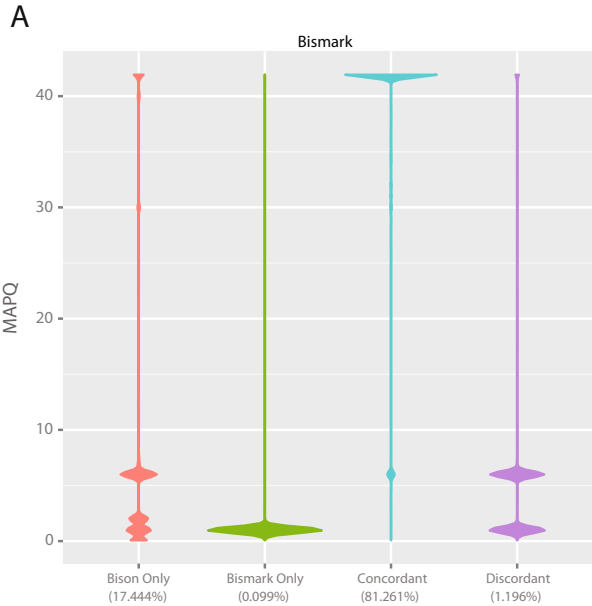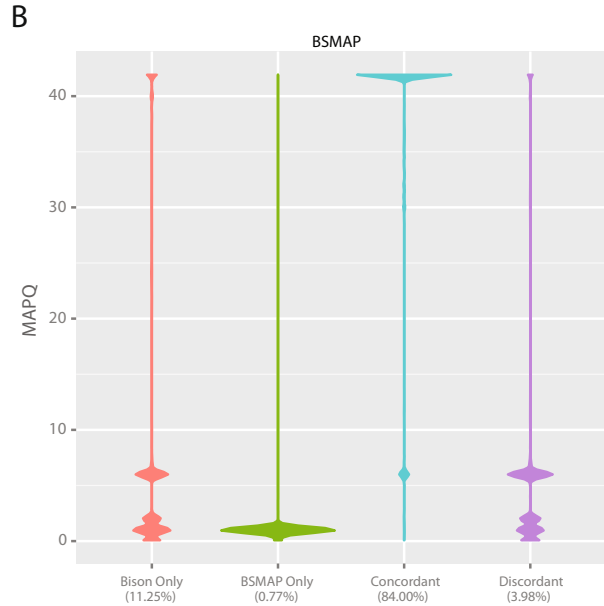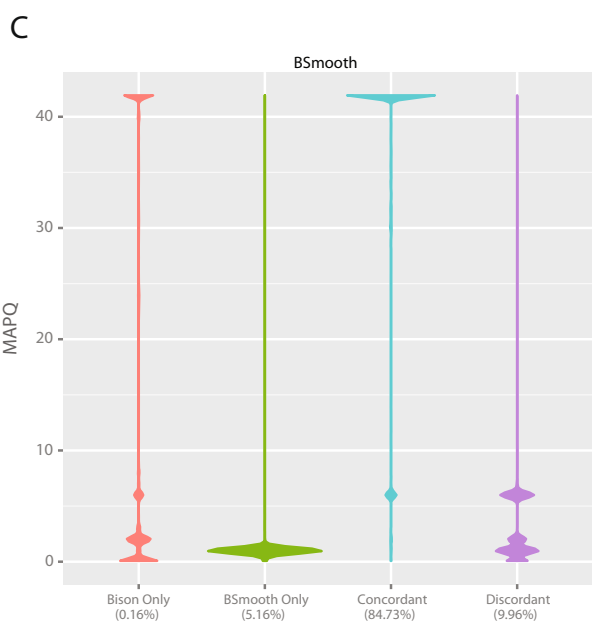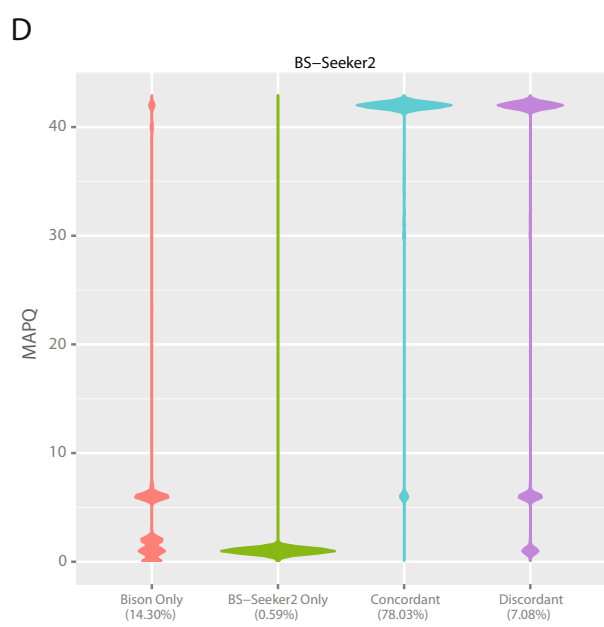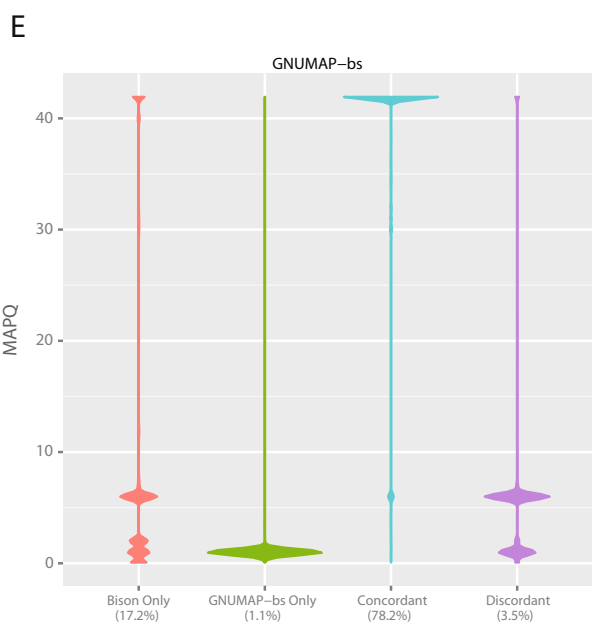

Supplement: 12859_2014_6665_MOESM5_ESM.pdf [file 12859_2014_6665_MOESM5_ESM.pdf]
